# Supplementary material for: Pseudomonas aeruginosa virulence reduction through phytochemical inhibition of Quorum Sensing activity: A Molecular Docking, Molecular Dynamics Simulation study
Source: Research Square preprint supplement (doi:10.21203/rs.3.rs-7664093/v1), 2025-11-02
Supplement: Supplementary file 1 [file 08846a45f2d5b43114148fa8.docx]

Supplementary Table S1: Important physicochemical properties of selected phytochemicals

| **Sl. No.** | **Phytochemical** | **Pubchem CID** | **MW** | **XLogP3** | **HBD** | **HBA** | **NR** |
| --- | --- | --- | --- | --- | --- | --- | --- |
| 1 | α-Thujene | 12444324 | 136.230 | 2.800 | 0 | 0 | 1 |
| 2 | α-Pinene | 6654 | 136.230 | 2.800 | 0 | 0 | 0 |
| 3 | Camphene | 6616 | 136.230 | 3.300 | 0 | 0 | 0 |
| 4 | Sabinene | 10887971 | 136.230 | 3.100 | 0 | 0 | 1 |
| 5 | β-Pinene | 14896 | 136.230 | 3.100 | 0 | 0 | 0 |
| 6 | 2.3-dehydro 1.8-cineole | 523035 | 152.230 | 1.900 | 0 | 1 | 0 |
| 7 | α-Phellandrene | 7460 | 136.230 | 3.200 | 0 | 0 | 1 |
| 8 | α-Terpinene | 7462 | 136.230 | 2.800 | 0 | 0 | 1 |
| 9 | p-Cymene | 7463 | 134.220 | 4.100 | 0 | 0 | 1 |
| 10 | 1,8-Cineole | 2758 | 154.250 | 2.500 | 0 | 1 | 0 |
| 11 | Limonene | 22311 | 136.230 | 3.400 | 0 | 0 | 1 |
| 12 | γ-Terpinene | 7461 | 136.230 | 2.800 | 0 | 0 | 1 |
| 13 | Terpinolene | 11463 | 136.230 | 2.800 | 0 | 0 | 0 |
| 14 | β-Linalool | 6549 | 154.250 | 2.700 | 1 | 1 | 4 |
| 15 | α-Thujone | 261491 | 152.230 | 2.300 | 0 | 1 | 1 |
| 16 | Camphor | 2537 | 152.230 | 2.200 | 0 | 1 | 0 |
| 17 | Verbenol | 61126 | 152.230 | 1.600 | 1 | 1 | 0 |
| 18 | Borneol | 6552009 | 154.250 | 2.700 | 1 | 1 | 0 |
| 19 | 3-Thujen-2-one | 91195 | 150.220 | 1.600 | 0 | 1 | 1 |
| 20 | Terpinen-4-ol | 11230 | 154.250 | 2.200 | 1 | 1 | 1 |
| 21 | p-Cymene-8-ol | 14529 | 150.220 | 2.000 | 1 | 1 | 1 |
| 22 | Myrtenol | 10582 | 152.230 | 1.600 | 1 | 1 | 1 |
| 23 | α-Terpineol | 17100 | 154.250 | 1.800 | 1 | 1 | 1 |
| 24 | Trans-piperitol | 85568 | 154.250 | 2.100 | 1 | 1 | 1 |
| 25 | p-Cumenol | 7465 | 136.190 | 2.900 | 1 | 1 | 1 |
| 26 | Cis-piperitol | 85567 | 154.250 | 2.100 | 1 | 1 | 1 |
| 27 | Cuminaldehyde | 326 | 148.200 | 2.700 | 0 | 1 | 2 |
| 28 | Carvyl acetate | 7335 | 194.270 | 2.600 | 0 | 2 | 3 |
| 29 | Cumic alcohol | 325 | 150.220 | 2.300 | 1 | 1 | 2 |
| 30 | Carvacrol | 10364 | 150.220 | 3.100 | 1 | 1 | 1 |
| 31 | Thymol | 6989 | 150.220 | 3.300 | 1 | 1 | 1 |
| 32 | Bornyl acetate | 6448 | 196.290 | 3.300 | 0 | 2 | 2 |
| 33 | Terpinen-4-ol acetate | 68749986 | 462.700 | 6.000 | 0 | 2 | 4 |
| 34 | Sabinyl acetate | 94266 | 194.270 | 2.400 | 0 | 2 | 3 |
| 35 | Perillic alcohol | 10819 | 152.230 | 2.100 | 1 | 1 | 2 |
| 36 | α-Terpineol acetate | 111037 | 196.290 | 2.400 | 0 | 2 | 3 |
| 37 | Eugenol | 3314 | 164.200 | 2.000 | 1 | 2 | 3 |
| 38 | β-Caryophyllene | 5281515 | 204.350 | 4.400 | 0 | 0 | 0 |
| 39 | Calamenene | 6429077 | 202.330 | 5.100 | 0 | 0 | 1 |
| 40 | α-Calacorene | 12302243 | 200.320 | 4.400 | 0 | 0 | 1 |
| 41 | Caryophyllene oxide | 1742210 | 220.350 | 3.600 | 0 | 1 | 0 |
| 42 | Cadalene | 10225 | 198.300 | 5.600 | 0 | 0 | 1 |
| 43 | Sclareol oxide | 7057250 | 262.400 | 5.700 | 0 | 1 | 0 |
| 44 | Sclareol | 163263 | 308.500 | 4.900 | 2 | 2 | 4 |
| 45 | Native ligand(3-oxo-C12-HSL) | 3246941 | 297.390 | 4.100 | 1 | 4 | 11 |

**MW**: Molecular Weight in Daltons, **XlogP3**: Partition coefficient, **HBD**: Hydrogen Bond Donor

count, **HBA**: Hydrogen Bond Acceptor count, **NR**: Number of Rotatable bonds


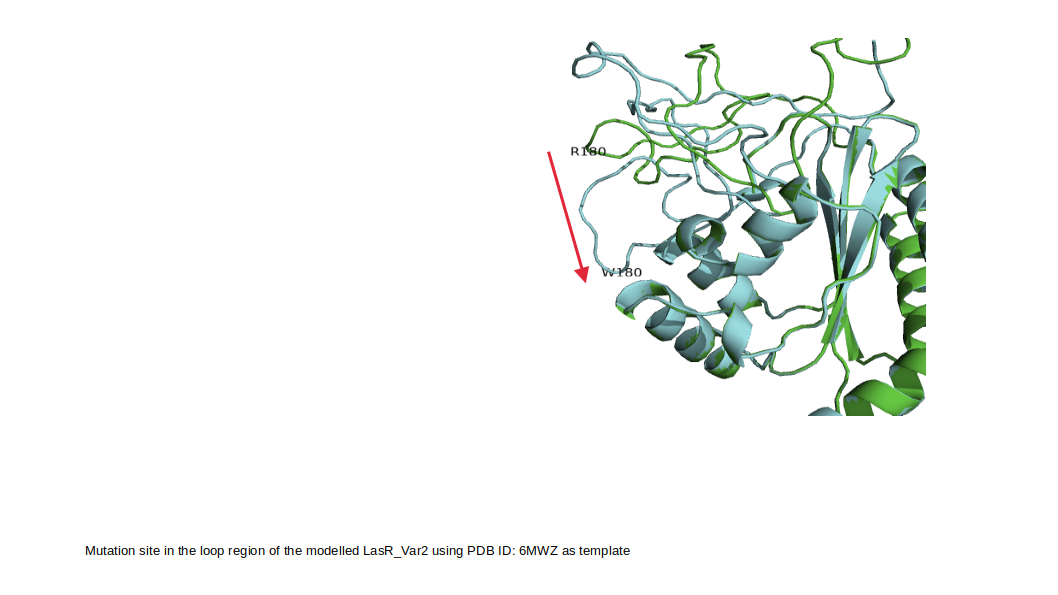


Supplementary Fig. 1**.** Mutation site in the loop region of the modelled LasR_Var2 (Cyan) upon alignment with LasR_Can using PDB ID-6MWZ as template


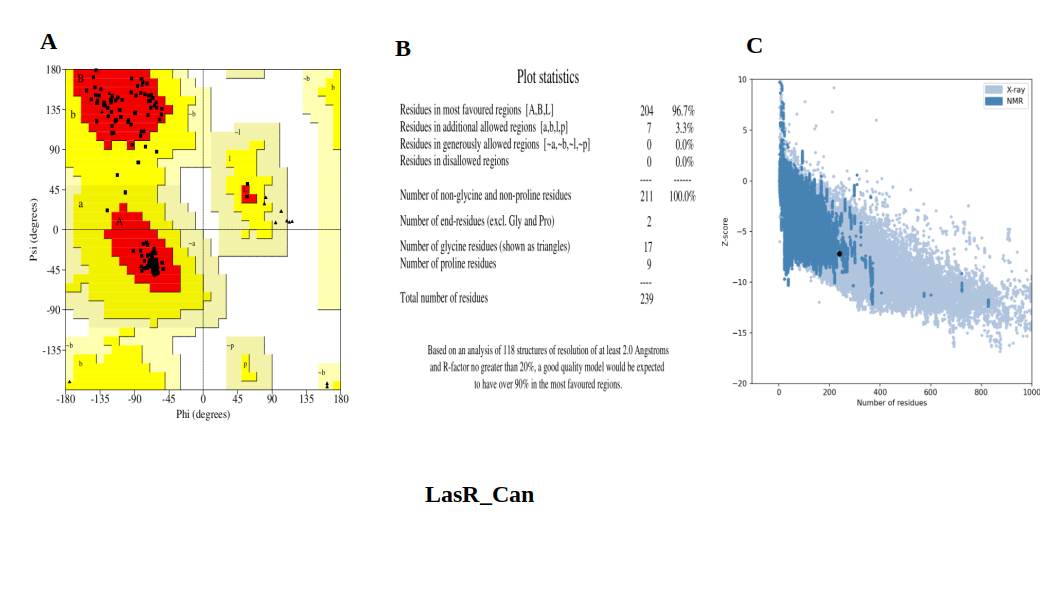


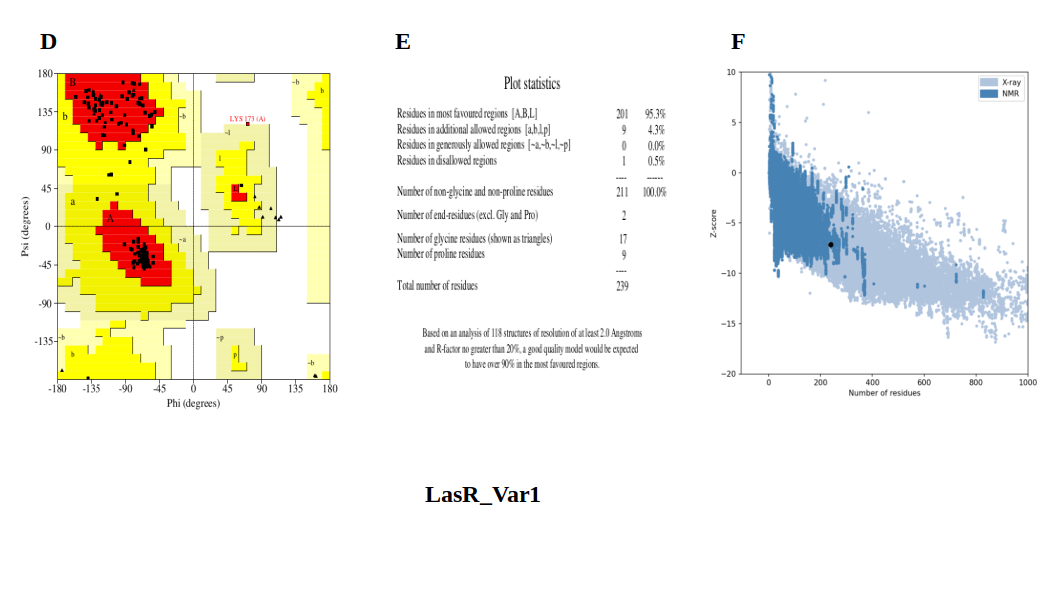


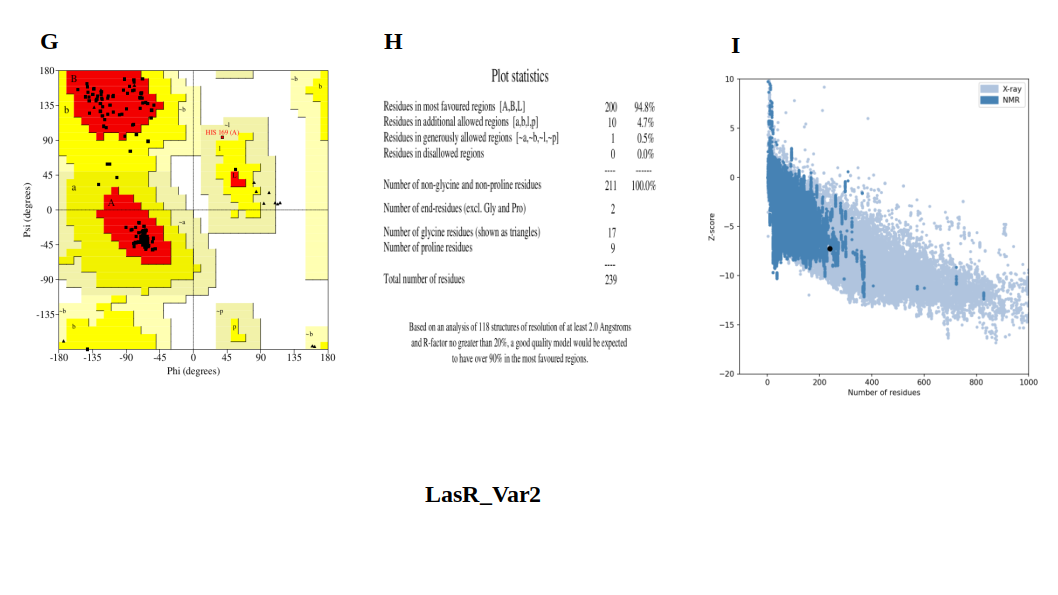


Supplementary Fig. 2**.** Ramachandran plot, Ramachandran plot statistics and Z score of the modelled proteins; LasR_Can(A,B,C), LasR_Var1**(**D,E,F**)**, LasR_Var2(G,H,I**)** of *P. aeruginosa*


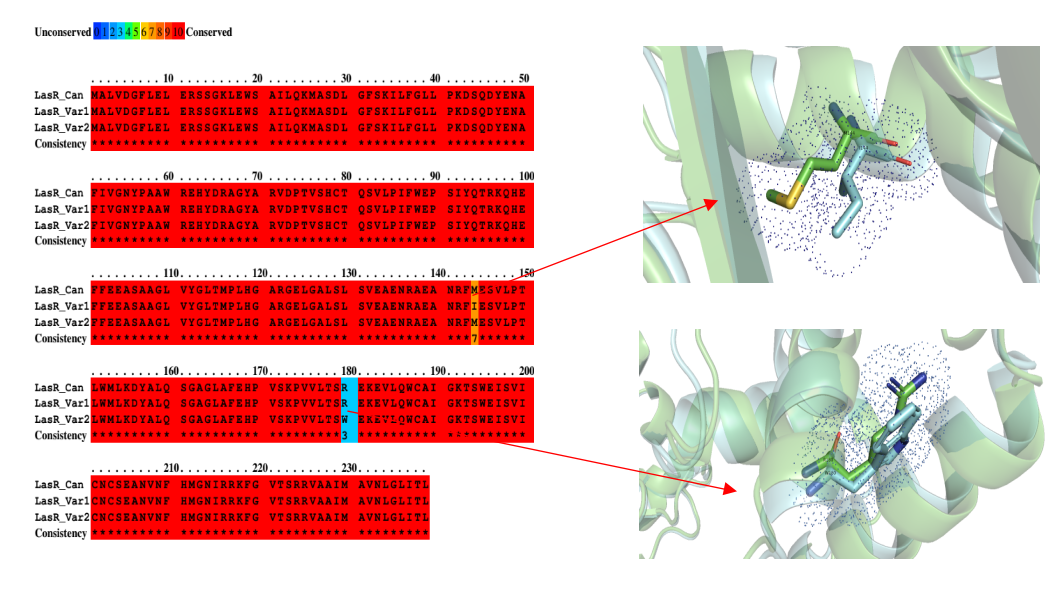
Supplementary Fig. 3.Multiple sequence alignment of LasR cannonical and its two variants through Praline server (<https://www.ibi.vu.nl/programs/pralinewww/index.php>). “*” refers to the consistency of the results due to same residues in protein alignment. Mutation sites are represented through PyMol.
