# Supplementary material for: Pseudomonas aeruginosa virulence reduction through phytochemical inhibition of Quorum Sensing activity: A Molecular Docking, Molecular Dynamics Simulation study
Source: Research Square preprint supplement (doi:10.21203/rs.3.rs-7664093/v1), 2025-11-02
Supplement: Supplementary file 2 [file 2619b869d28b158dccb92064.xlsx]

## Sheet: Sheet1
Sl. No.	Phytochemical	Pubchem CID	Pose No	Docking Score	Residue Atom	Ligand atom	H Bond in Å
1	Cumic alcohol	325	6	-6.19	R61:2HH2	O	2.4
			7	-6.17	T115:OG1	H	2.1
					W88:HE1	O	2.7
2	Cuminaldehyde	326	1	-7.35	Y93:OH	O	2.7
			2	-6.79	W60:HE1	O	2.7
			3	-6.7	Y93:OH	O	2.9
			4	-6.61	S129:OH	O	2.9
			5	-6.44	W88:HE1	O	2.7
					T115:OG1	O	3
					T75:OG1	O	3
			6	-6.24	W88:HE1	O	2.8
					T115:OG1	O	3.1
					T75:OG1	O	3.3
			7	-6.16	D65:OD1	O	3.3
			8	-6.09	D65:OD1	O	3.4
					R61:2HH2	O	2.6
3	Camphor	2537	1	-6.55	A127:NH	O	2.7
			9	-6.06	Y64:HH	O	2.2
4	Bornyl acetate	6448	6	-6.75	R61:2HH2	O	2.1
			9	-6.23	R61:2HH2	O	2.1
5	β-Linalool	6549	2	-5.92	D73:OD2	H	1.9
			4	-5.63	A127:NH	O	2.3
			5	-5.59	D73:OD2	H	2.3
			6	-5.41	A127:NH	O	2.7
					G38:O	H	2.5
			7	-5.39	S129:OG	H	2.1
6	Thymol	6989	1	-7.33	D73:OD2	H	2.4
			3	-6.67	W60:HE1	O	2.5
			4	-6.13	A127:NH	O	2.4
			7	-5.93	T115:OG1	H	2.7
7	Carvyl acetate	7335	1	-7.57	S129:H	O	2.2
			2	-6.9	W60:HE1	O	2.3
			3	-6.88	Y64:HH	O	2.6
			5	-6.75	Y64:HH	O	2.4
			6	-6.69	S129:H	O	2.3
			9	-6.36	A127:NH	O	2.5
8	p-Cumenol	7465	1	-6.86	Y93:OH	H	2.1
			6	-5.66	R61:2HH2	O	2.1
					D65:OD1	H	2.5
			7	-5.62	D65:OD1	H	2.4
9	Carvacrol	10364	4	-6.67	W60:HE1	O	2
			7	-6.52	W88:HE1	O	2.6
					T75:OG1	H	2.7
					T115:OG1	H	2.1
			8	-6.22	A127:NH	O	2.3
			9	-6.16	A127:NH	O	2.5
10	Myrtenol	10582	1	-6.53	A127:NH	O	2.3
					G38:O	H	2.5
			2	-6.27	D65:OD1	H	2.3
					R61:2HH2	O	2
			3	-6.26	A127:NH	O	2.5
			4	-6.26	D73:OD2	H	2.6
			5	-6.07	Y64:OH	H	2.5
					D73:OD2	H	2.1
			6	-6.06	R61:2HH2	O	2.6
					R61:2HH1	O	1.8
			7	-6.04	R61:2HH2	O	2.1
					R61:2HH1	O	2.4
			9	-5.83	D65:OD1	H	2
11	Perillic alcohol	10819	2	-6.59	Y93:OH	H	2.5
			4	-6.36	R61:2HH2	O	2.4
					D65:OD1	H	1.9
12	Terpinen-4-ol	11230	1	-7.38	Y56:OH	H	2.6
			3	-6.87	S129:OG	H	2.3
			4	-6.48	Y56:OH	H	2.5
			7	-6.03	A127:NH	O	2.4
			8	-6.01	Y64:OH	H	2.1
13	p-Cymene-8-ol	14529	1	-7.81	S129:OG	H	2.2
			2	-7.71	S129:OG	H	2.3
			3	-6.73	A127:NH	O	2.5
			4	-6.71	A127:NH	O	2.5
			5	-6.56	S129:OG	H	2.5
			7	-6.25	A127:NH	O	2.5
14	Α-Terpineol	17100	2	-7	D73:OD2	H	2.1
			3	-6.78	A127:NH	O	2.6
			5	-6.31	A127:NH	O	2.3
			6	-6.02	Y56:OH	H	2.7
					S129:OG	H	2.2
			8	-5.9	D73:OD2	H	1.8
15	Verbenol	61126	1	-6.58	A127:NH	O	2.6
			2	-6.46	Y64:OH	H	2.4
16	Cis-piperitol	85567	3	-6.57	A127:NH	O	2.7
			4	-6.21	T75:OG1	H	2.3
			5	-5.96	D73:OD2	H	2
			6	-5.93	Y64:OH	H	2.3
17	Trans-piperitol	85568	2	-6.47	T75:OG1	H	2.3
			4	-6.37	W88:HE1	O	2.7
			5	-6.33	S129:OG	H	2.3
					Y56:OH	H	2.6
			8	-5.98	W88:HE1	O	2.7
18	3-Thujen-2-one	91195	1	-7	T75:HG1	O	2.2
					W88:HE1	O	2.5
			2	-6.34	T75:HG1	O	2.2
					W88:HE1	O	2.6
			8	-5.8	Y64:HH	O	2.5
			9	-5.73	A127:NH	O	2.7
19	Sabinyl acetate	94266	1	-7.21	T75:HG1	O	2.1
			3	-6.94	S129:HG	O	2.4
			4	-6.9	A127:NH	O	2.6
			5	-6.79	R61:2HH1	O	2
					R61:2HH2	O	2.5
			6	-6.75	S129:HG	O	2.8
			7	-6.68	W60:HE1	O	1.8
			9	-6.14	A127:NH	O	2.3
20	α-Terpineol acetate	111037	2	-7.45	T75:HG1	O	2.3
			3	-7.21	T75:HG1	O	2.2
			6	-6.55	R61:2HH2	O	2.3
			7	-6.52	Y64:HH	O	2.8
21	Sclareol	163263	1	-7.65	W60:HE1	O	2.3
			5	-5.47	H78:HD1	O	2.2
			6	-5.12	H78:HD1	O	1.9
			7	-5.09	R61:2HH1	O	2
			8	-4.99	H78:HD1	O	2
					H78:HD1	O	2.7
			9	-4.81	D65:OD2	H	2.5
					R61:1HH2	H	2
22	α-Thujone	261491	2	-6.37	A127:NH	O	2.7
			4	-6.21	A127:NH	O	2.6
			6	-6.14	A127:NH	O	2.7
23	Caryophyllene oxide	1742210	2	-6.09	A127:NH	O	2.9
			3	-6.07	S129:HG	O	2.6
			8	-4.9	S77:HG	O	2.4
24	N-3-Oxo-Dodecanoyl-L-Homoserine (Native Ligand)	3246941	1	-8.02	T75:HG1	O	2
			2	-7.77	T75:HG1	O	2
			3	-7.46	W60:HE1	O	2
					T75:HG1	O	2.6
					S129:HG	O	2.3
			4	-7.45	A127:NH	O	2.3
					Y64:HH	O	2
			5	-7.32	A127:NH	O	2.8
			6	-7.23	R61:2HH1	O	2
					R61:2HH2	O	2.2
			7	-7.09	T75:HG1	O	2.1
			9	-6.68	S129:OG	H	2.5
					S129:HG	O	2.4
					Y56:HH	O	2.4
25	Borneol	6552009	1	-6.33	A127:O	H	2.7
					A127:NH	O	2.6
			2	-6.32	A127:NH	O	2.6
			3	-6.28	A127:NH	O	2.6
			4	-6.16	Y64:OH	H	2.1
			6	-6.11	A127:NH	O	2.6
26	Sclareol oxide	7057250	8	-5.25	H78:HD1	O	2.5
27	Terpinen-4-ol acetate	68749986	6	-4.69	F87:NH	O	2
Table S4:	Nm of docked confirmations of phytochemicals showing H bonding against LasR Variant 2
