# Supplementary material for: Pseudomonas aeruginosa virulence reduction through phytochemical inhibition of Quorum Sensing activity: A Molecular Docking, Molecular Dynamics Simulation study
Source: Research Square preprint supplement (doi:10.21203/rs.3.rs-7664093/v1), 2025-11-02
Supplement: Supplementary file 3 [file 2e9c82de5cf15c31921d737f.xlsx]

## Sheet: Sheet2
SL. No	Compound name	Total number of poses	Conserved amino acids forming H bonds	Number of conserved amino acids
1	N-3-Oxo-Dodecanoyl-L-Homoserine (Native Ligand)	24	W60, S129, T75, Y93, D73, W88, R61, A127, T115, E48, A70, D65, Y64, Y56	14
2	Cuminaldehyde	20	Y93, R61, S129, T75, Y64, W60, L110, D65, D73, W88, T115, A127	12
3	Sabinyl acetate	19	S129, R61, T75, Y93, W60, A127	6
4	Sclareol	18	T75, D73, G54, R61, Q98, I52, R66, Q94, W60, H78, D65, Y56	12
5	Myrtenol	17	A127, R61, Y64, Y47, D73, G38, D65, D73	8
6	Eugenol	16	W88, T115, S129, R61, T75, A127, W60,	7
7	β-Linalool	15	A127, R61, Y47, W60, D73, G38	6
8	Carvyl acetate	15	T75, S129, R61, W60, Y64, A127	6
9	α-Terpineol acetate	15	S129, R61, A127, T75, Y64, W60	6
10	Thymol	14	T75, S129, A127, D73, W88, W60, T115	7
11	p-Cymene-8-ol	14	A127, G38, D73, Y64, W88, S129	6
12	Α-Terpineol	14	A127, R61, D73, S129, G38, Y56	6
13	Borneol	14	A127, G38, R61, Y47, Y64	5
14	p-Cumenol	13	L110, R61, D73, Y64, Y47, T75, S129, Y93, D65	9
15	Trans-piperitol	13	T75, D73, A127, G38, R61, W88, S129, Y56	8
16	Perillic alcohol	12	R61, D73, Y47, W60, L110, Y93, D65	7
17	Verbenol	12	R61, A127, Y64, Y47, G38	5
18	Cumic alcohol	11	R61, S129, Y64, W60, T75, D73, V76, W88	8
19	Carvacrol	11	Y64, G38, L125, W60, W88, T75, S129, T115, Y47, A127	10
20	3-Thujen-2-one	10	S129, A127, W88, T115, R61, T75, Y64	7
21	Camphor	9	A127, R61, Y64	3
22	Bornyl acetate	9	S129, R61, T75	3
23	Terpinen-4-ol	9	A127, D73, Y56, S129, Y64	5
24	α-Thujone	9	R61, A127, Y64, Y47, G38, S129, T75	7
25	Cis-piperitol	7	S129, D73, R61, A127, T75, Y64	6
26	Sclareol oxide	4	R61, R66, H78	3
27	Caryophyllene oxide	3	A127, S129, S77	3
28	Terpinen-4-ol acetate	2	R61, F87	2
29	1,8-Cineole	1	A127	1
30	2.3-dehydro 1.8-cineole	1	E48	1
Table S5:	Total Nm of docked poses and conserved amino acids involved in H bonding on LasR_Can, LasR_Var1, LasR_Var2

## Sheet: Sheet3
SL. No.	Compound name	Total number of poses	Conserved amino acids forming H bonds	Number of conserved amino acids
1	N-3-Oxo-Dodecanoyl-L-Homoserine (Native Ligand)	24	W60, S129, T75, Y93, D73, W88, R61, A127, T115, E48, A70, D65, Y64, Y56	14
2	Cuminaldehyde	20	Y93, R61, S129, T75, Y64, W60, L110, D65, D73, W88, T115, A127	12
3	Sabinyl acetate	19	S129, R61, T75, Y93, W60, A127	6
4	Sclareol	18	T75, D73, G54, R61, Q98, I52, R66, Q94, W60, H78, D65, Y56	12
5	Myrtenol	17	A127, R61, Y64, Y47, D73, G38, D65, D73	8
