# Supplementary material for: Pseudomonas aeruginosa virulence reduction through phytochemical inhibition of Quorum Sensing activity: A Molecular Docking, Molecular Dynamics Simulation study
Source: Research Square preprint supplement (doi:10.21203/rs.3.rs-7664093/v1), 2025-11-02
Supplement: Supplementary file 4 [file 642765e4a7fe5c19521914c1.xlsx]

## Sheet: Sheet1
Sl. No.	Phytochemicals	Pubchem CID	Pose No	Docking Score	Residue Atom	Ligand atom	H Bond in Å
1	Cumic alcohol	325	1	-6.75	R61:2HH1	O	2.3
					R61:2HH2	O	2.4
			4	-6.1	S129:OG	O	2.4
			8	-5.74	R61:2HH1	O	2.4
			9	-5.58	Y64:OH	O	2.5
2	Cuminaldehyde	326	1	-6.98	Y93:OH	O	2.8
			2	-6.91	R61:2HH1	O	2.3
					R61:2HH2	O	2.2
			4	-6.02	T75:OG1	O	2.9
					S129:OG	O	3
			5	-5.87	S129:OG	O	2.8
					T75:OG1	O	2.9
			8	-5.67	Y64:OH	O	3.5
3	Camphor	2537	2	-6.47	A127:HN	O	2.6
			4	-6.36	A127:HN	O	2.4
			7	-6.28	R61:2HH1	O	2.3
					R61:2HH2	O	2.6
			8	-6.21	R61:2HH1	O1	2.6
4	1,8-Cineole	2758	2	-6.34	A127:HN	O1	2.9
5	Eugenol	3314	1	-6.85	W88:HE1	O	2.5
					T115:OG1	H	2.3
					S129:OG	H	2.4
					S129:HG	O	2.1
			2	-6.76	W88:HE1	O	2.6
					T115:OG1	H	2.3
					S129:OG	H	2.3
			3	-6.63	S129:OG	H	2.7
			4	-6.51	S129:HG	O	2.1
			5	-6.12	R61:2HH1	O	2.3
					R61:2HH2	O	2.3
			6	-6.08	R61:2HH1	O	2.7
			7	-6	R61:2HH1	O	2.3
					R61:2HH1	O	2.3
					R61:2HH2	O	2.4
			9	-5.76	S129:OG	H	2.4
6	Bornyl acetate	6448	1	-7.91	S129:HG	O	2.6
					S129:HG1	O	2.9
			5	-7.02	R61:2HH1	O	2
					R61:2HH2	O	2
7	β-Linalool	6549	3	-5.8	A127:HN	O	2.6
			5	-5.42	R61:2HH1	O	2.4
			6	-5.35	R61:2HH1	O	2.3
					R61:2HH2	O	2.6
			7	-5.27	A127:HN	O	2.7
			8	-5.23	Y47:O	O	2.6
8	Thymol	6989	1	-7.58	T75:OG1	H	2.5
			2	-6.77	S129:HG	H	2.1
			4	-6.17	A127:HN	O	2.4
			6	-6.05	A127:HN	O	2.4
			9	-5.87	D73:OD2	H	2.2
					T75:OG1	H	2.3
9	Carvyl acetate	7335	1	-7.38	S129:HG	O	2.5
					S129:HG	O	2.3
					T75:HG1	O	2.6
			2	-7.21	R61:2HH1	O	2.4
			5	-6.64	R61:2HH1	O	2.4
			7	-6.5	R61:2HH1	O	2.7
			8	-6.31	W60:HE1	O	1.9
10	p-Cumenol	7465	1	-6.99	L110:O	H	2.7
			2	-6.18	R61:2HH2	O	2.3
			6	-5.61	D73:OD2	H	2.4
			7	-5.61	Y64:OH	H	2.4
11	Carvacrol	10364	2	-6.8	Y64:OH	H	2.4
			3	-6.43	G38:O	H	2.6
					L125:O	H	2.7
			9	-6.05	W60:HE1	O	2.7
12	Myrtenol	10582	1	-6.49	A127:HN	O	2.3
			4	-6.06	R61:2HH2	O	2
			5	-6.04	A127:O	H	2.3
			6	-5.97	Y64:OH	H	2.1
			8	-5.89	A127:O	H	2.2
			9	-5.86	R61:2HH2	O	2.4
					Y47:O	H	2.5
13	Perillic alcohol	10819	1	-6.62	R61:2HH1	O	2.4
					R61:2HH2	O	2.4
			2	-6.56	R61:2HH1	O	2.2
					R61:2HH2	O	2.4
			3	-6	D73:OD2	H	2.5
			5	-5.78	R61:2HH1	O	2.4
					R61:2HH2	O	2.7
			6	-5.4	D73:OD2	H	2
			8	-5.25	Y47:O	H	2.3
					R61:2HH2	O	1.9
14	Terpinen-4-ol	11230	4	-6.51	A127:HN	O	2.4
15	p-Cymene-8-ol	14529	2	-6.82	A127:HN	O	2.6
					G38:O	H	2.7
			4	-5.87	D73:OD2	H	1.9
			6	-5.71	D73:OD2	H	2.3
16	Α-Terpineol	17100	2	-6.73	A127:NH	O	2.8
			4	-6.29	A127:O	H	2.6
			5	-6.25	R61:2HH1	O	2.4
					R61:2HH2	O	2.6
			7	-5.95	A127:NH	O	2.5
17	Verbenol	61126	2	-6.6	R61:2HH2	O	2.3
			3	-6.53	A127:NH	O	2.5
			4	-6.4	A127:HN	O	2.3
			5	-6.31	R61:2HH1	O	2.3
					R61:2HH2	O	2.4
			8		Y64:OH	H	2.1
18	Trans-piperitol	85568	2	-6.63	T75:OG1	H	2.4
					D73:OD2	H	2.3
			3	-6.29	T75:OG1	H	2.4
			5	-6.11	A127:NH	O	2.5
			6	-6	A127:NH	O	2.5
			7	-5.94	G38:O	H	2.3
					A127:NH	O	2.5
			8	-5.85	R61:2HH1	O	2.4
19	3-Thujen-2-one	91195	1	-7.1	S129:HG	O	2.3
			4	-6.29	A127:HN	O	2.6
			8	-5.97	A127:HN	O	2.9
20	Sabinyl acetate	94266	1	-7.09	S129:HG	O	2.5
			2	-6.87	R61:2HH1	O	2.1
			3	-6.44	T75:HG1	O	2
			4	-6.44	S129:HG	O	2.3
			9	-5.82	S129:HG	O	2
21	α-Terpineol acetate	111037	1	-7.23	S129:HG	O	2
			2	-7.23	R61:2HH1	O	2.2
					R61:2HH2	O	2.4
			3	-7.04	A127:HN	O	2.7
			4	-7.04	R61:2HH1	O	2.3
			5	-6.82	A127:HN	O	2.7
			6	-6.77	T75:HG1	O	2.7
			8	-6.63	A127:HN	O	2.4
			9	-6.59	R61:2HH1	O	2.1
					R61:2HH2	O	2.8
22	Sclareol	163263	1	-8.05	T75:OG1	H	2.5
			2	-7.67	D73:OD2	H	1.8
					R61:2HH1	O	2.4
					R61:2HH2	O	2.6
			6	-5.17	Y56:O	H	2.5
					G54:O	H	2.4
					G54:HN	H	2
			7	-5.11	R61:1HH2	O	2.1
			8	-4.76	G54:O	H	2.1
23	α-Thujone	261491	1	-6.75	R61:2HH1	O	2.3
					R61:2HH2	O	2.4
			4	-6.48	A127:HN	O	2.7
			6	-6.35	R61:2HH1	O	2.7
24	2.3-dehydro 1.8-cineole	523035	9	-4.27	E48:HN	O	2.7
25	N-3-Oxo-Dodecanoyl-L-Homoserine (Native Ligand)	3246941	1	-8.25	W60:HE1	O	2.4
					Y93:HH	O	2.4
					S129:HG	O	2
			2	-8.08	D73:OD2	H	1.8
					T75:HG1	O	2.6
					S129:HG	O	2.4
					S129:HG	O	2.4
					W60:HE1	O	2.1
			3	-8.06	Y93:HH	O	2.4
					S129:HG	O	2
					W60:HE1	O	2.6
			4	-7.94	W60:HE1	O	2
					S129:HG	O	2.1
					S129:HG	O	2.6
					T75:HG1	O	2.7
					D73:OD2	H	1.9
			6	-7.69	S129:OG	H	2.1
					W88:HE1	O	2.6
			7	-7.62	W88:HE1	O	2.8
					S129:HG	O	2.1
					T75:HG1	O	2.3
			9	-7.22	W60:HE1	O	1.9
					Y93:HH	O	2.5
26	Borneol	6552009	1	-6.53	A127:HN	O	2.3
					G38:O	H	2.7
			2	-6.39	A127:HN	O	2.5
			5	-6.13	R61:2HH1	O	2.7
27	Sclareol oxide	7057250	4	-6.49	R61:2HH1	O	2.2
					R61:2HH2	O	2.6
28	Terpinen-4-ol acetate	68749986	5	-7.39	R61:HE	O	2.2
Table S2:	Nm of docked confirmations of phytochemicals showing H bonding against LasR Canonical
