# Supplementary material for: Pseudomonas aeruginosa virulence reduction through phytochemical inhibition of Quorum Sensing activity: A Molecular Docking, Molecular Dynamics Simulation study
Source: Research Square preprint supplement (doi:10.21203/rs.3.rs-7664093/v1), 2025-11-02
Supplement: Supplementary file 5 [file 9593fd596b5864cef2a329db.xlsx]

## Sheet: Sheet1
Sl. No.	Phytochemicals	Pubchem CID	Pose No	Docking Score	Residue Atom	Ligand atom	H Bond in Å
1	Cumic alcohol	325	1	-6.88	R61:HE	O	2.4
					R61:2HH2	O	2.5
					W60:HE1	O	2.6
			3	-6.5	R61:1HH2	O	2
			6	-5.94	T75:OG1	H	2.3
			7	-5.81	T75:OG1	H	2.1
					D73:OD2	H	2.6
			8	-5.77	V76:O	H	2.5
2	Cuminaldehyde	326	1	-7.25	R61:HE	O	2.5
					R61:2HH2	O	2.3
					W60:HE1	O	2.6
			2	-7.07	Y93:OH	O	2.8
					L110:O	O	3.3
			3	-6.56	D65:OD1	O	3.4
					R61:1HH2	O	2.1
			4	-6.2	S129:OG	O	3.1
					T75:OG1	O	2.9
			5	-6.2	S129:OG	O	3
					T75:OG1	O	3
			6	-6.07	S129:OG	O	2.9
					T75:OG1	O	3
					D73:OD2	O	3.4
			8	-5.78	A127:NH	O	2.7
3	Camphor	2537	1	-6.49	A127:NH	O	2.7
			3	-6.42	R61:1HH2	O	2.5
			6	-6.2	R61:1HH2	O	2.4
4	Eugenol	3314	1	-6.76	S129:OG	H	2.5
			2	-6.43	S129:HG	O	2.3
			3	-6.34	T75:OG1	H	2.2
					W88:HE1	O	2.2
					S129:HG	O	2.1
					R61:1HH2	O	2.1
			5	-5.92	S129:OG	O	2.7
			6	-5.91	A127:NH	O	2.4
			7	-5.83	W60:HE1	O	2.5
			8	-5.77	R61:1HH2	O	2.6
			9	-5.63	A127:NH	O	2.4
5	Bornyl acetate	6448	1	-7.81	S129:HG	O	2.3
			3	-7.5	T75:HG1	O	2.2
			4	-7.3	R61:2HH2	O	2.5
			6	-7.22	R61:1HH1	O	2.6
					R61:1HH2	O	1.9
			7	-6.69	R61:1HH2	O	2.5
6	β-Linalool	6549	1	-6.31	W60:HE1	O	2
			2	-6.03	A127:NH	O	2.2
			3	-5.91	A127:NH	O	2.6
			6	-5.4	R61:1HH2	O	2.3
			8	-5.17	D73:OD2	H	2.3
7	Thymol	6989	1	-7.4	W88:HE1	O	2.8
			4	-6.27	A127:NH	O	2.4
			5	-6.19	A127:NH	O	2.4
			6	-6.13	W60:HE1	O	2
			8	-6.04	S129:OG	H	2.4
8	Carvyl acetate	7335	1	-7.72	S129:HG	O	2.3
					T75:HG1	O	2.6
			3	-6.78	R61:1HH2	O	2.1
			5	-6.6	R61:1HH2	O	2.3
			8	-6.34	S129:HG	O	2.7
9	p-Cumenol	7465	1	-7.11	L110:O	H	2.3
			2	-6.38	R61:2HH2	O	2.5
			3	-6	Y47:O	H	2.2
			6	-5.72	T75:OG1	H	2.2
			7	-5.66	S129:OG	H	2.7
			8	-5.39	Y47:O	H	2.1
10	Carvacrol	10364	3	-6	W88:HE1	O	2.7
			4	-5.97	T75:OG1	H	2.4
			5	-5.87	W88:HE1	O	2.7
					S129:OG	H	2.2
					T115:OG1	H	2.3
			8	-5.39	Y47:O	H	2.5
11	Myrtenol	10582	1	-6.51	A127:NH	O	2.4
			4	-6.1	D73:OD2	H	2.8
					Y64:OH	H	2.5
			6	-5.94	R61:1HH2	O	2
12	Perillic alcohol	10819	1	-6.99	R61:2HH2	O	2.1
					R61:HE	O	2.4
					W60:HE1	O	2.7
			2	-6.85	R61:2HH2	O	2.1
					R61:HE	O	2.4
					W60:HE1	O	2.7
			4	-6.55	L110:O	H	2.5
			8	-5.62	R61:2HH2	O	2.3
13	Terpinen-4-ol	11230	2	-6.85	D73:OD2	H	2.6
			6	-6.34	A127:NH	O	2.6
			7	-6.16	A127:NH	O	2.6
14	p-Cymene-8-ol	14529	2	-6.42	A127:NH	O	2.8
			3	-6.19	Y64:OH	H	2.6
			4	-6.18	A127:NH	O	2.6
			5	-6.13	W88:HE1	O	2.7
			7	-5.87	G38:O	H	2.8
					A127:NH	O	2.8
15	Α-Terpineol	17100	1	-7.47	D73:OD2	H	2.2
					S129:OG	H	2.6
			3	-6.37	A127:NH	O	2.7
			4	-6.17	A127:NH	O	2.4
					G38:O	H	2.8
			5	-6.11	A127:NH	O	2.5
			8	-5.74	D73:OD2	H	2.5
16	Verbenol	61126	1	-6.59	A127:NH	O	2.6
			3	-6.25	Y47:O	H	1.9
			4	-6.17	Y47:O	H	2.6
			7	-5.84	A127:NH	O	2.6
					G38:O	H	2.3
					A127:O	H	2.6
			9	-5.61	A127:NH	O	2.6
17	Cis-piperitol	85567	4	-6.39	S129:OG	H	2.3
			5	-6.33	D73:OD2	H	2.2
			6	-6.03	R61:1HH2	O	2.4
18	Trans-piperitol	85568	1	-7.21	W88:HE1	O	2.8
			3	-6.53	A127:NH	O	2.4
			6	-6.18	R61:1HH2	O	2.4
19	3-Thujen-2-one	91195	1	-7.36	W88:HE1	O	2.5
					T115:HG1	O	2.5
			4	-6.06	R61:1HH2	O	2.4
			9	-5.67	R61:1HH2	O	2.8
20	Sabinyl acetate	94266	1	-7.22	S129:HG	O	2.5
			2	-7.08	S129:HG	O	2.3
			3	-7.06	Y93:HH	O	1.9
			4	-6.78	W60:HE1	O	2.5
					R61:2HH2	O	2
			5	-6.71	A127:NH	O	2.6
			8	-6.36	S129:HG	O	2.5
			9	-6.28	R61:1HH1	O	2.5
					R61:1HH2	O	1.8
21	α-Terpineol acetate	111037	1	-7.74	W60:HE1	O	1.8
					S129:HG	O	2.5
			5	-6.69	R61:1HH1	O	2.7
					R61:1HH2	O	1.9
			8	-6.56	T75:HG1	O	2.2
22	Sclareol	163263	1	-8.05	D73:OD2	H	2.3
			2	-6.22	R61:2HH2	O	2
			4	-5.83	Q98:1HE2	O	2.6
					Q98:OE1	H	2.3
			6	-5.23	G54:NH	O	2.5
					I52:NH	O	2.7
			7	-5.09	R66:HE	O	2.5
					R66:HE	O	2.1
			8	-5.02	Q94:2HE2	O	2.3
			9	-5	Q98:OE1	H	2.4
23	α-Thujone	261491	2	-6.46	R61:1HH2	O	2.1
			5	-6.31	A127:NH	O	2.3
			7	-5.94	S129:HG	O	2.5
					T75:HG1	O	2.7
24	N-3-Oxo-Dodecanoyl-L-Homoserine (Native Ligand)	3246941	1	-8.3	S129:HG	O	2
					W60:HE1	O	2
					Y93:HH	O	2.1
			2	-7.8	S129:HG	O	2
					W60:HE1	O	2.1
					Y93:HH	O	2.3
			3	-7.78	Y93:HH	O	2.3
					W60:HE1	O	2
					W60:HE1	O	2.6
					R61:HE	O	2.6
					R61:2HH2	O	2.2
			4	-7.48	A127:NH	O	2.6
			5	-7.44	T75:HG1	O	2.1
					T115:HG1	O	2.4
					W88:HE1	O	2.7
					S129:HG	O	2.2
			6	-7.32	T75:HG1	O	2.2
			7	-7.3	T75:HG1	O	2.3
					S129:OG	H	2.4
					T115:HG1	O	2.6
					W88:HE1	O	2.6
			8	-6.56	T115:HG1	O	2.8
					S129:HG	O	1.9
					S129:HG	O	2.6
			9	-6.26	E48:HN	O	2.8
					A70:NH	O	2.2
					D65:O	H	2.2
25	Borneol	6552009	1	-6.54	A127:NH	O	2.4
			2	-6.37	A127:NH	O	2.3
			3	-6.35	Y47:O	H	2.5
			4	-6.34	R61:1HH2	O	2.7
			5	-6.06	Y64:OH	H	2.3
			6	-6.04	Y64:OH	H	2.3
26	Sclareol oxide	7057250	5	-5.34	R61:1HH2	O	2.3
			6	-5.22	R66:HE	O	2.2
Table S3:	Nm of docked confirmations of phytochemicals showing H bonding against LasR variant 1
